# Supplementary material
Source: Springer Nature journal article supplement (https://www.springermedizin.de/resource/supplementary/12958_2013_1148_MOESM1_ESM.pdf/9566908)

**a**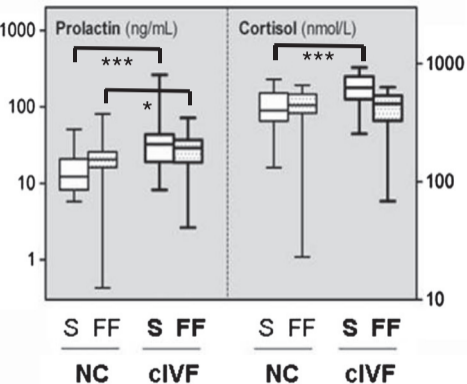**b**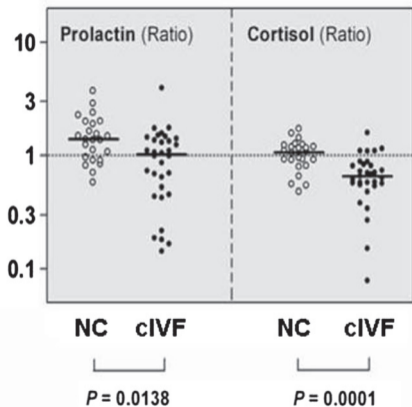

Supplement: MOESM1 [file 9566908]
